# Supplementary material for: The DNMT1/miR-34a/FOXM1 Axis Contributes to Stemness of Liver Cancer Cells
Source: Hindawi journal article supplement (doi:10.1155/2020/8978930), 2020-03-23
Supplement: f1 [file 8978930.f1.pdf]

Table S1. Primer sequences for quantitative real-time RT-PCR

| Gene       | Sequence(5'-3')           |
|------------|---------------------------|
| DNMT1      | F: GGCTGAGATGAGGCAAAAAG   |
|            | R: ACCAACTCGGTACAGGATGC   |
| miR-34a-5p | F: TGGCAGTGTCTTAGCTGGTTGT |
|            | R: GCGAGCACAGAATTAATACGAC |
| CD133      | F: ATGCTCTCAGCTCTCCCGC    |
|            | R: TTCTGTCTGAGGCTGGCTTG   |
| CD44       | F: GCAAACACAACCTCTGGTCC   |
|            | R: CCCACACCTTCTTCGACTGT   |
| ALDH1      | F: GCACGCCAGACTTACCTGTC   |
|            | R: CCTCCTCAGTTGCAGGATTAAG |
| Bmi1       | F: CTGGTTGCCATTGACAGCG    |
|            | R: AAATCCCGGAAAGAGCAGCC   |
| Sox2       | F: GCCCTGCAGTACAACTCCAT   |
|            | R: CTGATCATGTCCCGTAGGT    |
| Oct4       | F: GTGAGAGGCAACCTGGAGAG   |
|            | R: GAATGGGACCGAGGAGTACA   |
| FOXM1      | F: ATACGTGGATTGAGGACCACT  |
|            | R: TCCAATGTCAAGTAGCGGTTG  |
| GAPDH      | F: ACACTCACTCTTCTACCTTTG  |
|            | R: CAAATTCATTGTCGTACCAG   |
| U6         | F: CTCGCTTCGGCAGCACA      |
|            | R: AACGCTTCACGAATTTGCGT   |

Table S2. Primer sequences for methylation specific PCR

| Gene         | Sequence(5'-3')              |
|--------------|------------------------------|
| miR-34a-5p-M | F: ATGAGGATTAGGATTTTCGGAG    |
|              | R: AACGCATAAAAACGACGACAA     |
| miR-34a-5p-U | F: GGGGATGAGGATTAGGATTTT     |
|              | R: ATAAAACTAAAACTCTACCTTCGCT |

Table S3. Comparison of tumor formation ability of LCSCs and parental MHCC97H cells in Balb/c-nu mice (n = 6)

| Cell Type | Cell (n)        | Inoculated | Tumor Incidence (n/4) | Latency (d) | Tumor volume (mm <sup>3</sup> ) | Tumor weight (g) |
|-----------|-----------------|------------|-----------------------|-------------|---------------------------------|------------------|
| MHCC      | 10 <sup>5</sup> |            | 6/6                   | 23~48       | 659±76                          | 0.54±0.15        |
| HCSLC     | 10 <sup>5</sup> |            | 6/6                   | 6~12        | 1968±92*                        | 1.75±0.25*       |

The control samples included the tumor volume and tumor weight of LCSCs xenografts. Comparisons were carried out for LCSCs derived from MHCC97H cells with control cells, \* $P < 0.05$ .

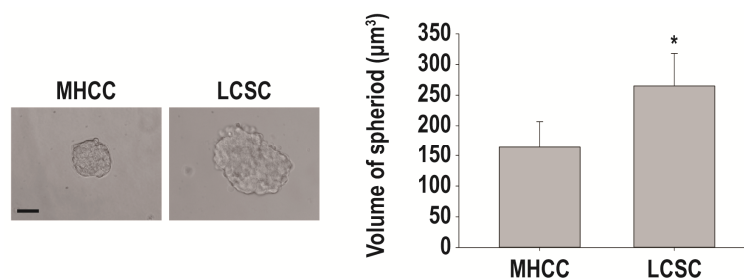

**Supplementary Figure S1** Comparing the volume of spherioids between MHCC97H cells and LCSCs.

\* $P < 0.05$  vs MHCC97H cells (n=3).

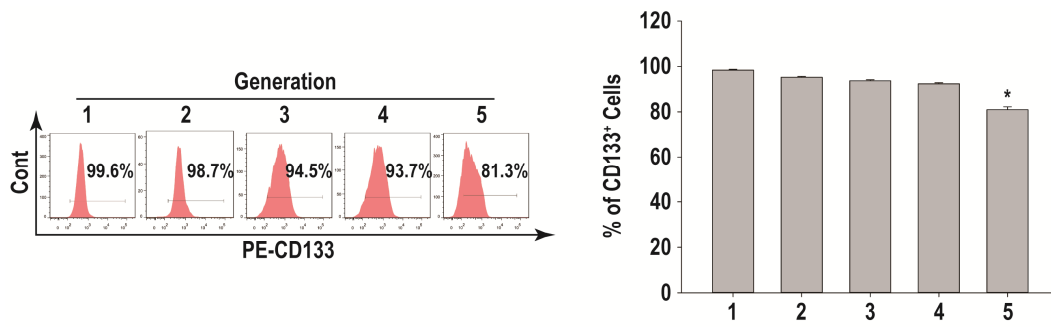

**Supplementary Figure S2** CD133<sup>+</sup> cell percentages of LCSC during serial passage in sphere culture.

\* $P < 0.05$  vs First Generation of LCSC (n=3).

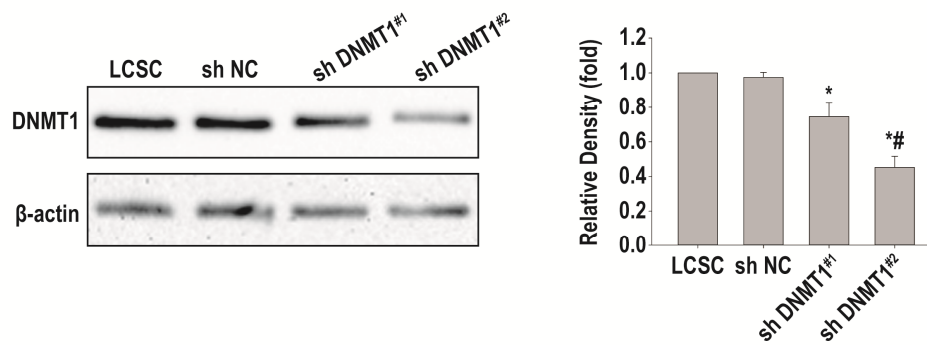

**Supplementary Figure S3** Effects of different DNMT1 shRNA on DNMT1 protein expression of MHCC97H derived LCSCs

\* $P < 0.05$  vs LCSC or sh NC (n=3); #  $P < 0.05$  vs sh DNMT1#1 (n=3).
